# Supplementary material for: Active shrinkage protects neurons following axonal transection
Source: PubMed Central journal article supplement — iScience. 2023 Aug 25;26(10):107715. doi: 10.1016/j.isci.2023.107715 (PMC10493506; doi:10.1016/j.isci.2023.107715), 2023-08-25
Supplement: mmc1.pdf [file mmc1.pdf]

**Supplemental information**

**Active shrinkage protects neurons**

**following axonal transection**

**Mehmet Şerif Aydın, Sadık Bay, Esra Nur Yiğit, Cemil Özgül, Elif Kaval Oğuz, Elçin Yenidünya Konuk, Neşe Aysit, Nureddin Cengiz, Ender Erdoğan, Aydın Him, Mehmet Koçak, Emrah Eroglu, and Gürkan Öztürk**

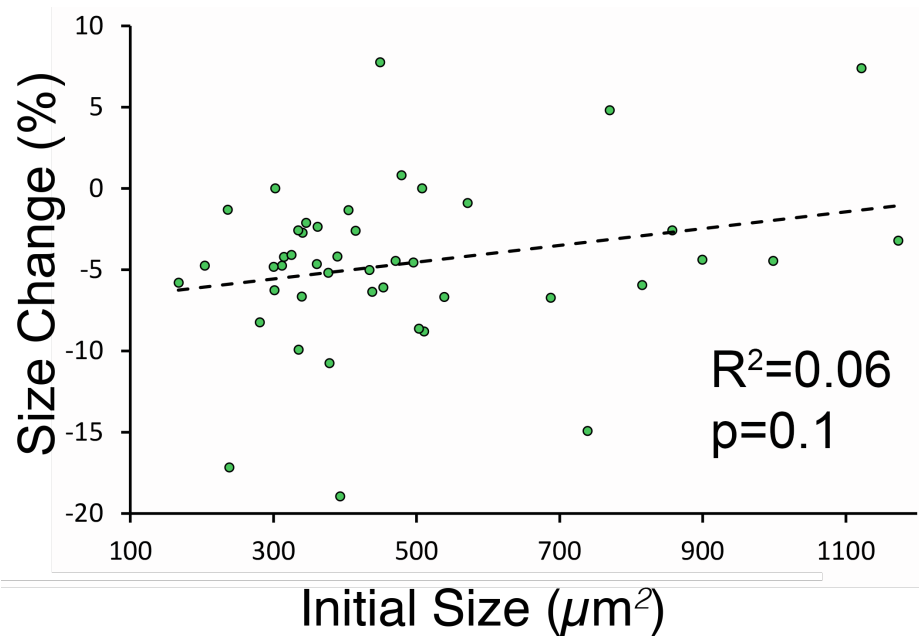

**Figure S1. Relationship of initial neuronal size and size change after axotomy. Related to Figure 1.** No significant correlation is found between the two variables (n=45 neurons from 4 animals).

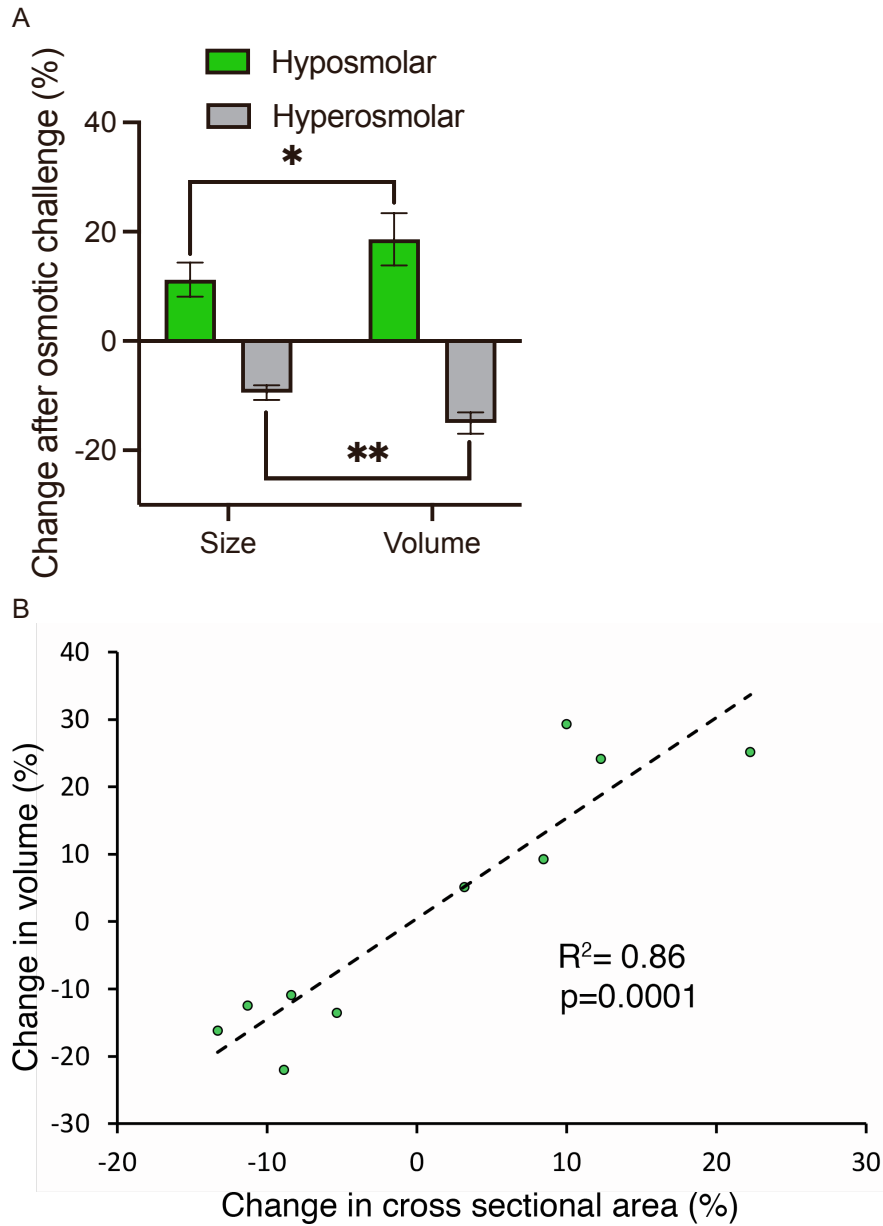

**Figure S2. Validation of measurement method of neuronal cell size changes. Related to Figure 1.** (A) Changes in cross sectional surface area and volume of neurons after hyposmotic (n=1/5) and hyperosmotic (n=1/5) challenges. Comparisons were made with paired t-test for ratios. (B) Relationship of calculated changes in cross sectional area and volume of the neurons after osmotic challenges showing strong correlation (n=1/10). Error bars: SEM; n=number of animals used/number of cells analyzed; \*p<0.05, \*\*p<0.001.

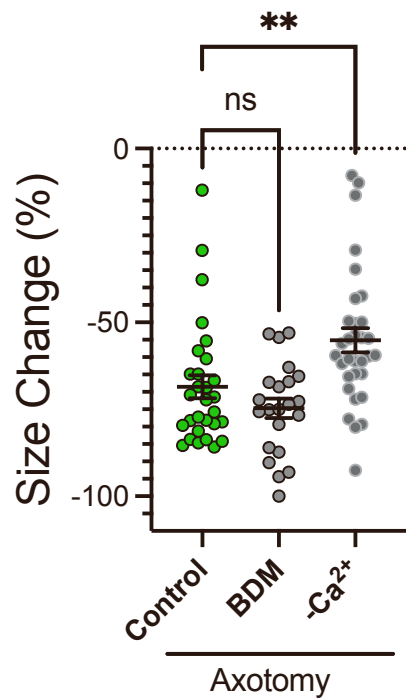

**Figure S3. Size change of axonal proximal stump after axotomy. Related to Figure 2.**

Scattered dot plot shows size changes 5 min after axotomy and effect of BDM and Ca<sup>++</sup> free medium. Mann-Whitney U test was used for comparisons; (n=3/29 (control), 3/22 (BDM), 3/32 (-Ca<sup>2+</sup>)). Error bars: SEM; n=number of animals used/number of cells analyzed; \*\*p<0.001.



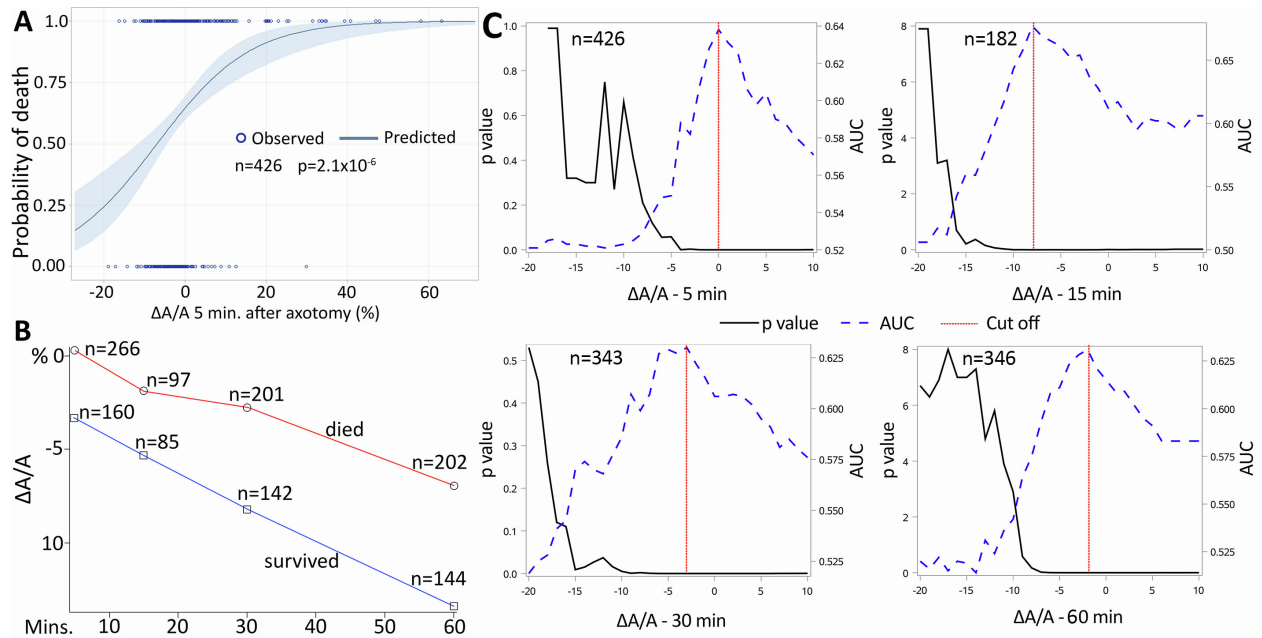

**Figure S4. Correlation of shrinkage with survival. Related to Figure 4. (A)** Univariable regression model showing correlation between degree of shrinkage and probability of neuronal death. **(B)** Longitudinal model of shrinkage of neurons that survived and died after axotomy. **(C)** Cut off values for survival – shrinkage relationship at 5, 15, 30 and 60 min following axotomy. Data from multiple experimental groups were pooled.

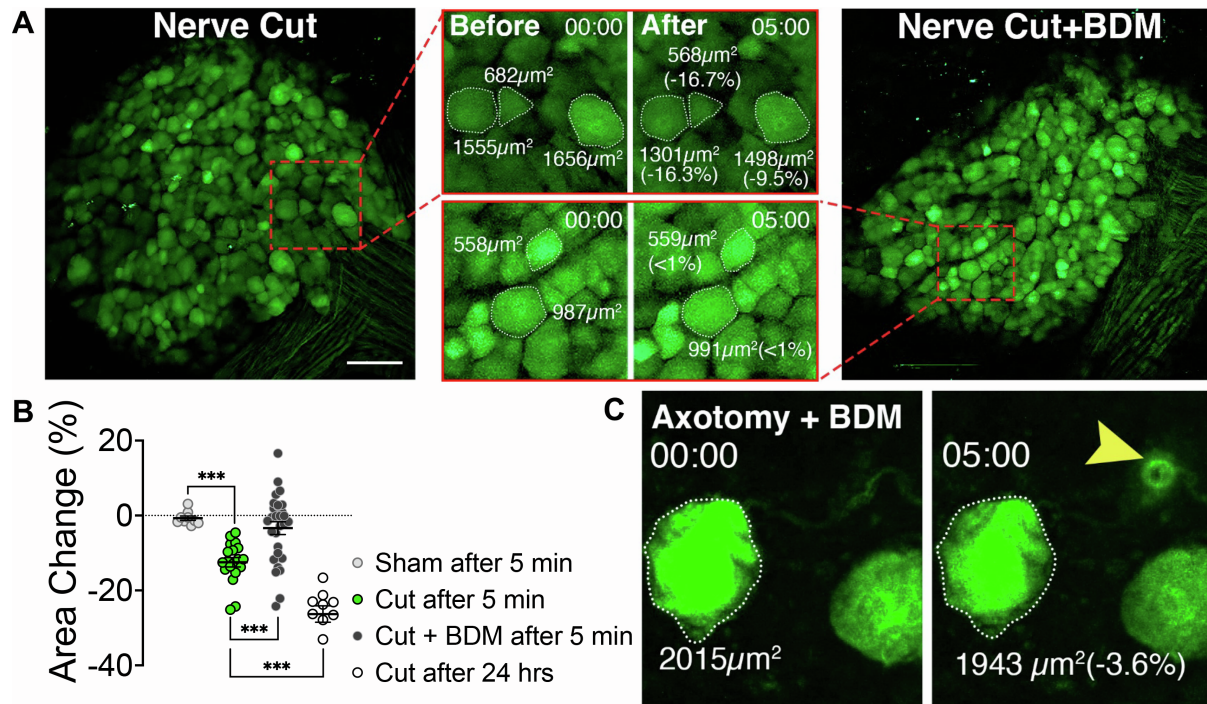

**Figure S5. Shrinkage in DRG neurons after in vivo nerve cut and single neuron axotomy with two-photon microscope. Related to Figure 4. (A)** Representative images of DRGs from TauEGFP mice before and after peripheral nerve cut and effect of inhibition of actomyosin contraction with myosin inhibitor butanedione monoxime (BDM) (scale bar, 100  $\mu\text{m}$ ). **(B)** Scattered dot plot shows surface area changes 5 min and 24 hrs after intervention in control and nerve cut groups and effect of BDM. Mann-Whitney U test was used for comparisons; (n=7/19 (cut 5 min), 7/10 (cut 24 hrs), 6/29 (cut+BDM 5 min), 3/9 (sham 5 min)), \*p<0.05, \*\*\*p<0.0001. **(C)** Images of a neuron from Thy1-GFP mouse axotomized *in vivo* in the presence of BDM, arrowhead points to the site of injury (compare it to Fig. 1A). Error bars: SEM; n=number of animals used/number of cells analyzed.

### **Video Legends**

**Video S1.** Axotomy and shrinkage of a cultured DRG neuron. Related to Figure 1.

**Video S2.**  $\text{Ca}^{++}$  entry into a DRG neuron after axotomy through unsealed proximal part. The neuron expresses  $\text{Ca}^{++}$  sensor - GCaMP6s. Related to Figure 1.

**Video S3.** Instant resealing of an axon cut-end that does not let  $\text{Ca}^{++}$  entry into DRG neuron through proximal part after axotomy. The neuron expresses  $\text{Ca}^{++}$  sensor - GCaMP6s. Related to Figure 1.

**Video S4.** Axotomy and shrinkage of a GFP-expressing DRG neuron imaged in 3D to visualize the volume change. Related to Figure 3.

**Video S5.** Complete amputation of an axon of a DRG neuron during shrinkage after axotomy, which results in a very efficient resealing. Related to Figure 4.

## Supplemental Text

### Membrane Depolarization by Axotomy

Axotomy caused about 16 mV depolarization on average and created 1-321 action potentials in 9 of 16 neurons. The firing rates of action potentials were 1.4-26 Hz, which lasted up to 37 secs and membrane stayed depolarized during the recording period of 25 mins. Resting membrane potential 24 hrs after axotomy had recovered to control conditions (-51.1 mV(control) vs. -57.1 mV (axotomized),  $p>0,05$ ); but when re-axotomized only 1 of 12 neurons generated action potential ( $p=0.016$ ) while all got depolarized with a voltage change similar to first axotomy.

### Shrinkage – Survival Relationship

Cumulative cell-deaths were reported for each hour from baseline to 24 hour for each group (Fig. 4). As this is an example of repeated measures data and the independent assumptions among observations may be violated, we employed mixed-modelling approach considering the repeated measures structure, using the MIXED procedure in SAS Version 9.4, where cumulative cell death was the outcome variable with time and experimental group and their interactions being the predictors. Time\*experimental group interaction was found to be highly significant ( $p<0.0001$ ). The slope estimate for the sham group was 0.19 ( $p<0.0001$ ), suggesting one death in about every 5 hours. Slope of BDM-Sham group was about 0.19 unit higher compared to that of the Sham group ( $p=0.0004$ , slope estimate=0.38), suggesting that BDM-Sham group had one more additional cell death for about every 5 hours compared to the sham group. Axotomy group had a slope estimate that was 0.53 unit higher ( $p<0.0001$ , slope estimate=0.71) than that of the Sham group, resulting in about one more additional cell death in every two hours. BDM-Axotomy group had about 0.85 excess cell-death per hour compared to Sham group ( $p<0.0001$ , slope estimate=1.04) and one more additional cell death for about every 3 hours compared to the control axotomy ( $p<0,0001$ ). The analyses of pooled data derived from images taken at the 5, 15, 30, 60<sup>th</sup> minutes and 24hrs after axotomy from *in vitro* groups revealed following results: 1. According to the univariable logistic regression model we developed, every 1% shrinkage by 5<sup>th</sup>, 15<sup>th</sup>, 30<sup>th</sup> and 60<sup>th</sup> minutes after axotomy resulted in 9, 7, 4 and 3% increase in likelihood of survival, respectively ( $p<0,0001$  for each time points). 2. Cut off points for 5, 15, 30 and 60 minutes after axotomy were 0%, -8%, -3% and -2% size change respectively; below which the chance of survival started to become significantly higher (Figure. S4). We also performed a longitudinal analysis of the data and constructed random-coefficients models where each cell had its own random intercept and slope to describe its profile overtime. In these models, initial cell size, which roughly defines different phenotypic subpopulation of DRG neurons, was not significantly associated with survival ( $p=0.58$ ) and it had no time interaction. However, survival status and time had a significant interaction as shown in the Figure S4, suggesting that the neurons that were able to continuously shrink were more likely to survive.
